# Supplementary material for: LncRNA NORAD defects deteriorate the formation of age-related macular degeneration
Source: publisher site journal article supplement (doi:10.18632/aging.204917), 2023-07-29
Supplement: Supplementary file [file aging-v15i15-204917-supplementary-material-SD1.pdf]

## SUPPLEMENTARY TABLES

**Supplementary Table 1. qRT-PCR primer sequence.**

| Name            | Forward primer (5'-3')    | Reverse primer (5'-3')      |
|-----------------|---------------------------|-----------------------------|
| VEGF-A(Human)   | TCTTCAAGCCATCCTGTGTG      | ATCCGCATAATCTGCATGGT        |
| APP(Human)      | CCGCTGCTTAGTTGGTGAGTTTGT  | ACGGTGTGCCAGTGAAGATGAGTT    |
| APOE(Human)     | AACTGGCACTGGGTCGCTTT      | GCCTTCAACTCCTTCATGGTCTCGT   |
| C3(Human)       | GGGGAGTCCCATGTACTCTATC    | GGAAGTCGTGGACAGTAACAG       |
| ICAM- 1(Human)  | ATGCCCAGACATCTGTGTCC      | GGGGTCTCTATGCCCAACAA        |
| NORAD (Human)   | TGATAGGATACATCTTGGACATGGA | AACCTAATGAACAAGTCCTGACATACA |
| GAPDH (Human)   | GGAGCGAGATCCCTCCAAAAT     | GGCTGTTGTCATACTTCTCATGG     |
| TFAM (Human)    | ATGGCGTTTCTCCGAAGCAT      | TCCGCCCTATAAGCATCTTGA       |
| PLOG (Human)    | GCTGCACGAGCAAATCTTCG      | GTCCAGGTTGTCCCCGTAGA        |
| ND1(Human)      | TTCTAATCGCAATGGCATTCT     | AAGGGTTGTAGTAGCCCGTAG       |
| ND5 (Human)     | TTCATCCCTGTAGCATTGTTCG    | GTTGGAATAGGTTGTTAGCGGTA     |
| APP (Mouse)     | TCCGAGAGGTGTGCTCTGAA      | CCACATCCGCCGTAAGAAGATG      |
| APOE (Mouse)    | CTGACAGGATGCCTAGCCG       | CGCAGGTAATCCCAGAAGC         |
| CRYAA (Mouse)   | ACGGCAAACACAACGAGAGG      | CATGCCATCAGCAGACAGG         |
| C3(Mouse)       | CCAGCTCCCCATTAGCTCTG      | GCACTTGCCTCTTTAGGAAGTC      |
| ICAM- 1 (Mouse) | GTGATGCTCAGGTATCCATCCA    | CACAGTTCTCAAAGCACAGCG       |
| GAPDH (Mouse)   | AGGTCGGTGTGAACGGATTTG     | TGTAGACCATGTAGTTGAGGTCA     |
| NORAD (Mouse)   | CGCTGTCCCGTAGAAGTCC       | GACGAGTGTGCTCCTGGGT         |

**Supplementary Table 2. The origin of reagent and resource.**

| Reagent                                           | Manufacturers  | Identifier |
|---------------------------------------------------|----------------|------------|
| A $\beta$ -40 ELISA                               | Thermo Fisher  | KHB3481    |
| A $\beta$ -42 ELISA                               | Thermo Fisher  | KHB3441    |
| VEGF-A ELISA                                      | Invitrogen     | KHGO111    |
| Complement component 3 (C3) ELISA                 | Abacam         | ab108823   |
| MitoSOXTM Red mitochondrial superoxide indicator  | Invitrogen     | M36008     |
| RNA Immunoprecipitation Kit                       | GENESEED       | P0101      |
| Protein G Plus/Protein A Agarose Suspension       | Millipore      | IP05-1.5ml |
| ECL Chemiluminescence substrate (ultra-sensitive) | Biosharp       | BL520A     |
| HiPerFect Transfection Reagent                    | QIANGEN        | 301705     |
| Sodium iodate                                     | Sigma          | S4007      |
| Cell Cycle and Apoptosis Analysis Kit             | Milunbio       | MAO334     |
| Annexin V-FITC/PI Apoptosis detection Kit         | Milunbio       | MAO220     |
| p21 Rabbit Polyclonal Antibodies                  | Proteintech    | 10355-1-AP |
| Phospho-P53 (Ser15) Rabbit Recombinant            | Proteintech    | 80195-1-RR |
| SIRT1 Rabbit Polyclonal antibody                  | Proteintech    | 13161-1-AP |
| PGC-1 $\alpha$ Mouse Monoclonal antibody          | Proteintech    | 66369-1-1g |
| Acetylated-lysine Antibody                        | Cell Signaling | 9441       |
| GAPDH Rabbit mAb                                  | Cell Signaling | D16H11     |
| Goat anti-Mouse IgG (H+L) Secondary Antibody      | ZSGB-BIO       | ZB-2305    |
| Goat anti-Rabbit IgG (H+L) Secondary Antibody     | ZSGB-BIO       | ZB-2301    |

**Supplementary Table 3. IP experiment wash buffer preparation.**

| <b>Wash buffer I</b> | <b>Final concentration</b> | <b>Total volume 100ml</b> |
|----------------------|----------------------------|---------------------------|
| HEPEs                | 10mmol/L                   | 1ml                       |
| NaCl                 | 100nmol/L                  | 10ml                      |
| EDTA                 | 5nmol/L                    | 1ml                       |
| Tween20              | 0.10%                      | 0.5ml                     |
| Benzamidine          | 10mmol/L                   | 0.016g                    |
| BSA                  | 3%                         | 3g                        |
| ddH2O                |                            | to 100 ml                 |

  

| <b>Wash buffer II</b> | <b>Final concentration</b> | <b>Total volume 100ml</b> |
|-----------------------|----------------------------|---------------------------|
| HEPEs                 | 10mmol/L                   | 1ml                       |
| NaCl                  | 100nmol/L                  | 10ml                      |
| EDTA                  | 5nmol/L                    | 1ml                       |
| Tween20               | 0.10%                      | 0.5ml                     |
| Benzamidine           | 10mmol/L                   | 0.016g                    |
| ddH2O                 |                            | to 100 ml                 |
